# Supplementary material
Source: MDPI journal article supplement (https://www.mdpi.com/2073-445X/13/3/276)
Supplement: s1 [file s1 › land-2865992-supplementary.pdf]

## Supplementary Materials

We have compiled the parameters used to evaluate five ecosystem services: crop production, carbon storage, water conservation, habitat quality, and soil retention. The following text is added to the Supplementary Materials:

### (1) Carbon storage (CS)

We calculated the carbon density data for the study area by collating existing research data within our study area. The respective carbon density data for each land type were derived from the aforementioned research studies[1,2], as illustrated in Table S1.

**Table S1**The carbon density of each land use/land cover (mg/ha).

| Land use/land cover | C_above | C_below | C_soil | C_dead |
|---------------------|---------|---------|--------|--------|
| farmland            | 9.0     | 4.0     | 25.0   | 0.3    |
| forestland          | 39.6    | 30.3    | 42.4   | 7.2    |
| the Yellow River    | 1.5     | 0.5     | 30.0   | 0.0    |
| open water          | 1.0     | 0.5     | 16.0   | 0.0    |
| grassland           | 18.1    | 13.7    | 31.0   | 0.4    |
| residential area    | 0.0     | 0.0     | 12.0   | 0.0    |
| mudflat             | 1.7     | 1.0     | 15.0   | 0.0    |
| aquaculture ponds   | 0.5     | 0.0     | 12.0   | 0.0    |
| ports               | 0.0     | 0.0     | 8.0    | 0.0    |
| saline-alkali land  | 0.0     | 0.0     | 8.6    | 0.0    |
| industrial land     | 0.0     | 0.0     | 7.1    | 0.0    |
| salt ponds          | 0.0     | 0.0     | 21.0   | 0.0    |

Note: C\_above is carbon density in aboveground biomass; C\_below is carbon density in belowground biomass; C\_soil is carbon density in the soil; C\_dead is carbon density in dead matter.

## (2)Water yield

The table of biophysical parameters (Table S2) essential for assessing water yield in this study primarily encompasses plant root depth (Root Depth) and crop evapotranspiration coefficient (Kc). These parameters were sourced from pertinent literature references[3,4] , as well as the InVEST modeling manual.

**Table S2** Biophysical table of water yield.

| Land use/land cover | Root_depth(mm) | Kc   | LULC_veg |
|---------------------|----------------|------|----------|
| farmland            | 2100           | 0.65 | 1        |
| forestland          | 5200           | 0.93 | 1        |
| the Yellow River    | 1              | 1    | 0        |
| open water          | 1              | 0.9  | 0        |
| grassland           | 2300           | 0.75 | 1        |
| residential area    | 500            | 0.23 | 0        |
| mudflat             | 1000           | 0.7  | 1        |
| aquaculture ponds   | 1              | 0.87 | 0        |
| ports               | 1              | 0.4  | 0        |
| saline-alkali land  | 300            | 0.2  | 0        |
| industrial land     | 1              | 0.4  | 0        |
| salt ponds          | 1              | 0.9  | 0        |

Note: Root\_depth is Maximum root depth (mm); Kc is the evapotranspiration coefficient of plants corresponding to the land type; LULC\_veg means whether the the LULC class is vegetated

### (3) Soil retention

We conducted a quantitative assessment of the spatial and temporal variations in soil retention. This assessment was performed using the Sediment Delivery Ratio module within the InVEST model. The specific parameters are adjusted based on the actual conditions in the study area[3].

**Table S3.** Biophysical table of soil retention.

| Land use/land<br>cover | usle_c | usle_p |
|------------------------|--------|--------|
| farmland               | 0.23   | 0.30   |
| forestland             | 0.08   | 1.00   |
| the Yellow River       | 0.00   | 0.02   |
| open water             | 0.00   | 0.00   |
| grassland              | 0.24   | 1.00   |
| residential area       | 0.00   | 0.00   |
| mudflat                | 1.00   | 0.5    |
| aquaculture            | 0.00   | 0.00   |
| ponds                  | 0.00   | 0.00   |
| ports                  | 0.00   | 0.00   |
| saline-alkali land     | 1.00   | 0.27   |
| industrial land        | 0.00   | 0.00   |
| salt ponds             | 0.00   | 0.00   |

### (4) Habitat quality

The InVEST model necessitates the inclusion of a Threat Factor Table (Table S4) and

Sensitivity Table (Table S5), and these are determined through a combination of referencing existing studies and tailoring them to the specific conditions within our study area [3,5].

**Table S4** Threat source impact distance level weights.

| Threat factors    | Maximum distance of influence | Weights | Spatial decay types |
|-------------------|-------------------------------|---------|---------------------|
| farmland          | 3.3                           | 0.85    | linear              |
| residential area  | 2.8                           | 0.9     | linear              |
| aquaculture ponds | 1.6                           | 0.65    | linear              |
| salt ponds        | 1.32                          | 0.49    | linear              |
| ports             | 5.52                          | 0.82    | linear              |
| industrial land   | 3.1                           | 0.8     | linear              |

**Table S5** Sensitivity of threat factors for different land uses.

| Land use/land cover | Habitat | Sensitivity to threats |                  |                   |            |       |                 |
|---------------------|---------|------------------------|------------------|-------------------|------------|-------|-----------------|
|                     |         | farmland               | residential area | aquaculture ponds | salt ponds | ports | industrial land |
| farmland            | 0       | 0                      | 0                | 0                 | 0          | 0     | 0               |
| forestland          | 1       | 0.65                   | 0.9              | 0.65              | 0.65       | 0.99  | 0.65            |
| the Yellow River    | 1       | 0.65                   | 0.9              | 0.3               | 0.45       | 0.99  | 0.55            |
| open water          | 1       | 0.45                   | 0.9              | 0.25              | 0.55       | 0.99  | 0.55            |
| grassland           | 1       | 0.5                    | 0.9              | 0.45              | 0.45       | 0.99  | 0.7             |
| residential area    | 0       | 0                      | 0                | 0                 | 0          | 0     | 0               |

|             |   |      |     |      |      |      |      |
|-------------|---|------|-----|------|------|------|------|
| mudflat     | 1 | 0.65 | 0.9 | 0.45 | 0.55 | 0.99 | 0.85 |
| aquacultur  | 0 | 0    | 0   | 0    | 0    | 0    | 0    |
| e ponds     |   |      |     |      |      |      |      |
| ports       | 0 | 0    | 0   | 0    | 0    | 0    | 0    |
| saline-     | 1 | 0.7  | 0.9 | 0.5  | 0.7  | 0.99 | 0.85 |
| alkali land |   |      |     |      |      |      |      |
| industrial  | 0 | 0    | 0   | 0    | 0    | 0    | 0    |
| land        |   |      |     |      |      |      |      |
| salt ponds  | 0 | 0    | 0   | 0    | 0    | 0    | 0    |

(5) Energy transformity rate

**Table S6.** Energy transformity rate

|                    | parameters | value                               | reference |
|--------------------|------------|-------------------------------------|-----------|
| crop production    | $T_{cp}$   | $1.58 \times 10^{15} \text{ sej/t}$ | [6]       |
| water conservation | $T_{wc}$   | $4.09 \times 10^4 \text{ sej/J}$    | [7]       |
| carbon storage     | $T_{cs}$   | $3.78 \times 10^{13} \text{ sej/t}$ | [7]       |
| habitat quality    | $T_{hq}$   | $2.92 \times 10^{19} \text{ sej/y}$ | [8]       |
| soil retention     | $T_{sr}$   | $7.4 \times 10^4 \text{ sej/J}$     | [9]       |

## References

1. Liu, H., Cui, J., & Zhang, J. Temporal and spatial evolution of carbon storage and ecological compensation in the coastal wetlands of the Yellow River Delta.

- Ecological Economy, **2023**,1–22.
2. Zhou, F., Ma, T., Li, X., Cui, B. Simulation and evaluation of ecosystem services in the coastal wetlands of the Yellow River Delta. *Wetland Science*, **2015**,13, 667–674.
  3. Zhang,J. Spatiotemporal dynamics and driving mechanisms of ecosystem services in the Yellow River Delta. (Master's thesis). Shandong University.**2023**.
  4. Lu, C., Cai, X., Hao, C., Liu, Y., Wang, Z., Ma, Y. Synergistic relationship of ecosystem services trade-offs in the highly efficient ecological-economic zone of the Yellow River Delta. *Journal of Applied Ecology*, **2023**,1–15.
  5. Wu, J.; Luo, J.; Zhang, H.; Qin, S.; Yu, M. Projections of Land Use Change and Habitat Quality Assessment by Coupling Climate Change and Development Patterns. *Science of The Total Environment* **2022**, 847, 157491, doi:10.1016/j.scitotenv.2022.157491.
  6. Zeng, Q. Research on the agricultural ecological-economic system of Guangxi Zhuang Autonomous Region based on energy analysis. (Master's thesis). Guangxi University.**2023**.
  7. Yang, T., Zhang, D., Shen, C., Ma, S., Song, L., & Li, X. Assessment of the functional value of watershed ecosystem services based on energy analysis: A case study of the Dongjiang River Basin. *Journal of Hydroecology*,**2023**, 44, 9–15.
  8. Yang, Q.; Liu, G.; Giannetti, B.F.; Agostinho, F.; M.V.B. Almeida, C.; Casazza, M. Emergy-Based Ecosystem Services Valuation and Classification Management Applied to China's Grasslands. *Ecosystem Services* **2020**, 42, 101073,
  9. Wang, C. Ecological ecosystem service assessment in Dongying based on energy analysis. (Doctoral dissertation). Shandong University.**2018**.
